# Supplementary material
Source: publisher site journal article supplement (https://cdn.jamanetwork.com/ama/content_public/journal/intemed/0/ioi190051supp2_prod.pdf)
Supplement: Supplementary file 1 [file ioi190051supp2_prod.pdf]

## Supplementary Online Content

Zhao L, Li D, Zheng H, et al. Acupuncture as adjunctive therapy for chronic stable angina: a randomized clinical trial. *JAMA Intern Med*. Published online July 29, 2019.

doi:10.1001/jamainternmed.2019.2407

**eFigure.** Location of Acupoints and Nonacupoints

**eTable 1.** CCS Angina Grade and 6WMD During the Baseline and at the End of Therapy

**eTable 2.** HRV During the Baseline and at the End of Therapy

This supplementary material has been provided by the authors to give readers additional information about their work.

**eFigure.** Location of Acupoints and Nonacupoints

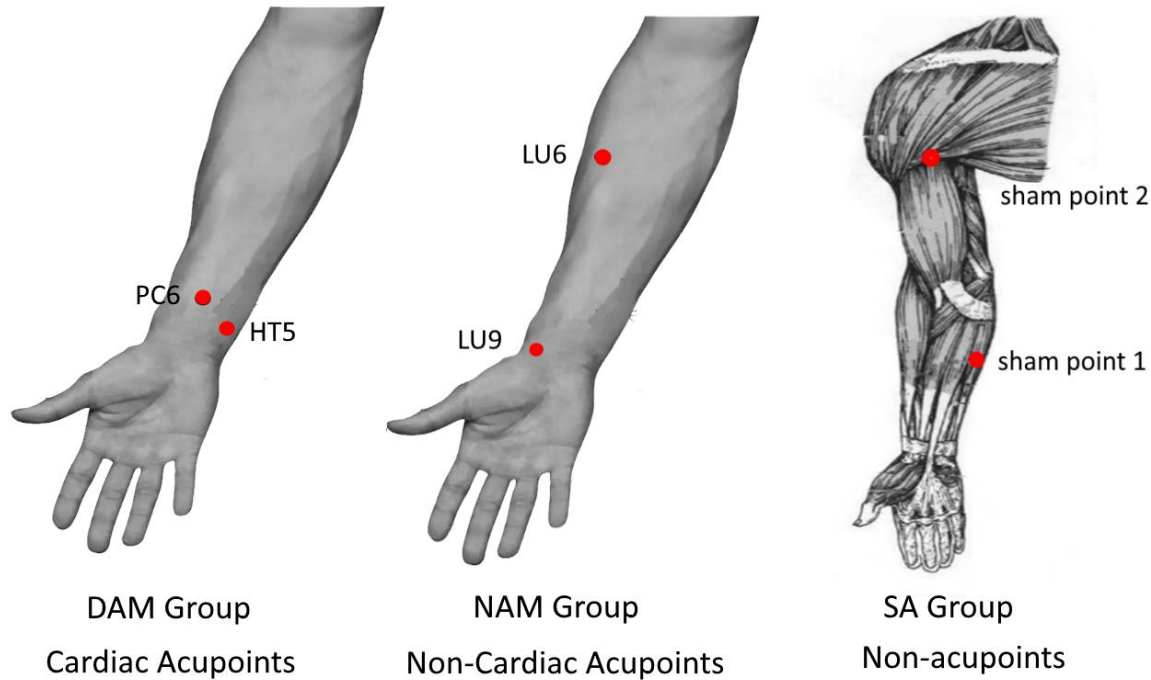

PC6: 2 *cun* above of the transverse crease of the wrist, between the tendons of m. palmaris longus and m. flexor carpi radialis.

HT5: 1 *cun* above the transverse crease of the wrist, on the palmar aspect of the forearm, on the radial border of the tendon of m. flexor carpi radialis.

LU9: on the transverse crease of the wrist, in the depression on the radial side of the radial artery.

LU6: in the forearm, 7 *cun* above the transverse crease of the wrist, on the line joining LU9 and LU5.

Sham point 1: on the ulnar side of the arm, half way between the epicondylus medialis of the humerus and the ulnar side of the wrist.

Sham point 2: on the front arm of deltoid muscle and biceps brachi junction.

**eTable 1.** CCS Angina Grade and 6MWD During the Baseline and at the End of Therapy

| Outcome measure                            | DAM           | NAM           | SA            | WL           | P value |
|--------------------------------------------|---------------|---------------|---------------|--------------|---------|
| <b>CCS angina grade in Baseline, n (%)</b> |               |               |               |              | .2491   |
| I                                          | 44(44.4)      | 52(52.5)      | 42(41.5)      | 42(42.4)     |         |
| II                                         | 54(54.5)      | 47(47.4)      | 54(53.4)      | 54(54.5)     |         |
| III                                        | 1(1.0)        | 0(0.0)        | 4(3.9)        | 3(3.0)       |         |
| IV                                         | 0(0.0)        | 0(0.0)        | 1(0.9)        | 0(0.0)       |         |
| <b>CCS angina grade in 1-4 wk, n (%)</b>   |               |               |               |              | .0125   |
| I                                          | 58(63.04)     | 59(62.77)     | 44(44.44)     | 47(50.00)    |         |
| II                                         | 33(35.87)     | 34(36.17)     | 51(51.52)     | 44(46.81)    |         |
| III                                        | 1(1.09)       | 0(0.00)       | 4(4.04)       | 3(3.19)      |         |
| IV                                         | 0(0.00)       | 1(1.06)       | 0(0.00)       | 0(0.00)      |         |
| <b>Changes in CCS angina grade, n (%)</b>  |               |               |               |              | .036    |
| No change or deterioration                 | 72(78.26)     | 83(88.30)     | 90(90.91)     | 85(90.43)    |         |
| ≥ 1 class improvement                      | 20(21.74)     | 11(11.70)     | 9 (9.09)      | 9(9.57)      |         |
| <b>6MWD, m, mean (SD)</b>                  |               |               |               |              |         |
| baseline                                   | 379.50(68.47) | 394.90(82.18) | 378.80(78.89) | 381.0(83.61) | .424    |
| <b>Treatment, 1-4 wk</b>                   | 408.60(65.02) | 415.10(82.63) | 384.20(75.91) | 385.0(77.80) | .006    |

Note:

CCS: Canadian Cardiovascular Society; 6MWD: 6-minute walk distance test

**eTable 2.** HRV During the Baseline and at the End of Therapy

| <b>Outcome measure</b>               | <b>DAM<br/>(n=67)</b> | <b>NAM<br/>(n=66)</b> | <b>SA<br/>(n=66)</b> | <b>WL<br/>(n=59)</b> | <b>P Value</b> |
|--------------------------------------|-----------------------|-----------------------|----------------------|----------------------|----------------|
| <b>LF, ms<sup>2</sup>, mean (SD)</b> |                       |                       |                      |                      |                |
| baseline                             | 575.79(110.14)        | 592.88(103.70)        | 567.23(135.16)       | 607.88(119.43)       | .2202          |
| 1-4 wk                               | 513.41(98.86)         | 533.65(89.77)         | 540.71(115.92)       | 562.38(126.01)       | .0888          |
| <b>HF, ms<sup>2</sup>, mean (SD)</b> |                       |                       |                      |                      |                |
| baseline                             | 138.20(35.40)         | 134.99(42.78)         | 136.99(46.42)        | 132.54(42.63)        | .8839          |
| 1-4 wk                               | 156.02(42.53)         | 145.09(36.07)         | 142.92(37.70)        | 146.46(41.50)        | .2349          |
| <b>LF/HF</b>                         |                       |                       |                      |                      |                |
| baseline                             | 4.48(1.53)            | 4.94(2.52)            | 4.85(3.07)           | 5.26(2.56)           | .2875          |
| 1-4 wk                               | 3.61(1.53)            | 5.54(13.87)           | 4.11(1.65)           | 4.22(1.91)           | .0404          |
| <b>SDNN, ms, mean (SD)</b>           |                       |                       |                      |                      |                |
| baseline                             | 126.56(45.91)         | 137.23(59.26)         | 128.71(34.80)        | 127.43(32.09)        | .4455          |
| 1-4 wk                               | 129.40(51.00)         | 135.14(45.81)         | 140.51(107.19)       | 126.00(31.53)        | .4750          |
| <b>SDANN, ms, mean (SD)</b>          |                       |                       |                      |                      |                |
| baseline                             | 105.87(42.72)         | 149.65(93.70)         | 121.10(44.83)        | 118.27(36.82)        | .0756          |
| 1-4 wk                               | 120.49(46.17)         | 121.01(29.46)         | 168.74(27.50)        | 118.26(35.04)        | .5195          |
| <b>rMSDD, ms, mean (SD)</b>          |                       |                       |                      |                      |                |
| baseline                             | 36.86(25.69)          | 36.89(28.25)          | 43.15(30.80)         | 36.73(21.89)         | .4805          |
| 1-4 wk                               | 39.06(35.71)          | 37.27(34.25)          | 42.47(36.83)         | 40.66(31.14)         | .7499          |

---

| <b>PNN50 %, mean (SD)</b> |             |            |              |             |       |
|---------------------------|-------------|------------|--------------|-------------|-------|
| baseline                  | 8.82(10.17) | 8.51(8.79) | 10.39(11.03) | 9.47(11.90) | .6576 |
| 1-4 wk                    | 8.28(9.08)  | 8.60(8.02) | 9.23(9.14)   | 9.56(12.92) | .4082 |

Note: A 24-hour recording was considered eligible for this study if it had more than 12 hours of analyzable data, had half of night-time and day-time periods analyzable, and if more than 50% of the recording revealed sinus rhythm.

LF: low frequency; HF: high frequency; SDNN: standard deviation of normal RR (NN) intervals; SDANN: standard deviation of 5-minute mean RR intervals; rMSSD: root-mean square of difference of successive RR intervals; PNN50: proportion of adjacent RR intervals more than 50 ms different.
